# Supplementary material
Source: Springer Nature journal article supplement (https://www.springermedizin.de/resource/supplementary/12889_2012_4957_MOESM1_ESM.pdf/9495396)
Supplement: MOESM1 [file 9495396]

Search String

Search (randomized controlled trial[pt, #108] OR controlled clinical trial[pt, #108] OR randomized controlled trials[mh, #813] OR random allocation[mh, #813] OR double-blind method[mh, #813] OR single-blind method[mh, #813] OR clinical trial[pt, #108] OR clinical trials[mh, #813] OR ("clinical trial"[tw]) OR ((singl\*[tw] OR doubl\*[tw] OR trebl\*[tw] OR tripl\*[tw]) AND (mask\*[tw] OR blind\*[tw])) OR placebos[mh, #813] OR placebo\*[tw] OR random\*[tw] OR non-randomi\*[tw] OR before after study[tw] OR time series[tw] OR case control[tw] OR prospective cohort[tw] OR retrospective cohort[tw] OR cross-section\*[tw] OR prospective[tw] OR retrospective[tw] OR research design [mh:noexp] OR comparative study[mh, #813] OR evaluation studies[mh, #813] OR follow-up studies[mh, #813] OR prospective studies[mh, #813] OR control\*[tw] OR prospectiv\*[tw] OR volunteer\*[tw] OR longitud\*[tw] OR descripti\*[title/abstract] OR study[title/abstract] OR evaluat\*[title/abstract]) **AND**

Search (HIV Infections/prevention and control[MeSH] OR HIV[MeSH] OR hiv[tw] OR hiv-1[tw] OR hiv-2\*[tw] OR hiv1[tw] OR hiv2[tw] OR hiv infect\*[tw] OR human immunodeficiency virus[tw] OR human immune deficiency virus[tw] OR human immuno-deficiency virus[tw] OR human immune-deficiency virus[tw] OR ((human immun\*) AND (deficiency virus[tw])) OR acquired immunodeficiency syndromes[tw] OR acquired immune deficiency syndrome[tw] OR acquired immuno-deficiency syndrome[tw] OR acquired immune-deficiency syndrome[tw] OR ((acquired immun\*) AND (deficiency syndrome[tw])) OR (Hepatitis C/prevention and control[Mesh] OR hepatitis C[tw] OR hepatitis[title/abstract] OR HCV[title/abstract]) **AND**

Search (needle-exchange[title/abstract] OR needle exchange[title/abstract] OR needle/syringe program[title/abstract] OR needle/syringe programs[title/abstract] OR needle syringe[title/abstract] OR (needle[title/abstract] AND syringe[title/abstract]) OR needle/syringe program\*[title/abstract] OR syringe-exchange[title/abstract] OR syringe exchange\*[title/abstract] OR (supervis\*[title/abstract] AND inject\*[title/abstract]) OR Combined program\*[title/abstract] OR Combined prevention[title/abstract] OR (needle\*[title/abstract] AND access[title/abstract]) OR (syringe\*[title/abstract] AND access[title/abstract]) OR ((injection drug user\*[title/abstract] OR injecting drug user\*[title/abstract] OR IDU[title/abstract]) AND pharmacy[title/abstract] OR pharmacies[title/abstract] OR dispensar\*[title/abstract] OR chemist[title/abstract] OR chemists[title/abstract] OR apothecar\*[title/abstract]) **AND**

Search (Needle-Exchange Programs[Mesh] OR Needle-Exchange Programs/legislation and jurisprudence[Mesh] OR Community Health Services[Mesh] OR Substance Abuse, Intravenous/prevention and control[Mesh] OR Health Policy[Mesh] OR Harm reduction[Mesh] OR Public health administration[Mesh] OR Regional health planning[Mesh] OR Preventive Health Services[Mesh] OR Local Government[Mesh] OR Government Agencies[Mesh] OR Community Health Planning[Mesh] OR Community Health Centers[Mesh] OR Program Evaluation[Mesh] OR Socioeconomic factors[Mesh] OR Delivery of Health Care[Mesh] OR Community Pharmacy Services/legislation and jurisprudence[Mesh] OR Legislation, Pharmacy[Mesh] OR structural intervention\*[tw] OR politic\*[title/abstract] OR community[title/abstract] OR region\*[title/abstract] OR government[title/abstract] OR legislat\*[title/abstract] OR law[title/abstract] OR policy[title/abstract] OR (structural[tw] AND intervention[tw]) OR (structural[title/abstract] AND intervention[title/abstract]))
